# Supplementary material
Source: PubMed Central journal article supplement (PMC2491375)
Supplement: JCI0834277sd.pdf [file JCI0834277sd.pdf]

Supplemental Fig. 1

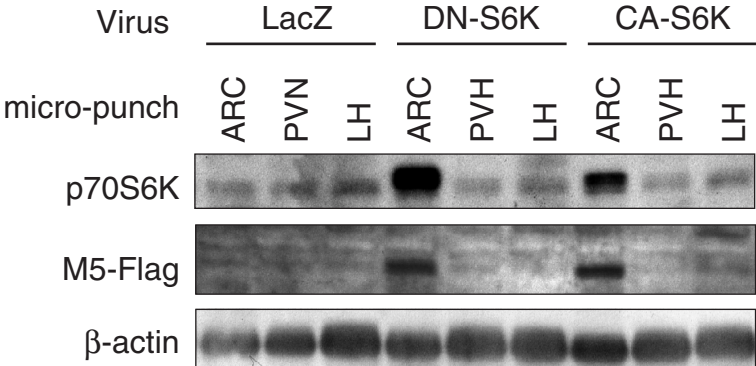

**Suppl. Fig. 1. Adenoviral overexpression is limited to the MBH.** Representative bands of the S6K protein level in the ARC (arcuate nucleus), PVN (paraventricular nuclei of the hypothalamus) and LH (lateral hypothalamus) of rats expressing LacZ (n=4), CA-S6K (n=4) or DN-S6K (n=4), detected by anti-S6K or anti-Flag. Quantitation of S6K and Flag bands from PVN and LH revealed no significant differences between the viruses.

# Supplementary Table 1

Body weight (g) before the first surgery, the second surgery, and the clamp; plasma insulin (ng/mL) and glucose (mg/dL) levels before the start of MBH insulin, and during the basal and clamped periods.

|                              | No Virus      |               |               |               |               |               | One-day HF plus MBH insulin |               |                     | Hyperinsulinemic clamp |               |
|------------------------------|---------------|---------------|---------------|---------------|---------------|---------------|-----------------------------|---------------|---------------------|------------------------|---------------|
|                              | NV-VEH        | NV-INS        | HF-INS        | LZ-VEH        | LZ-INS        | CA-S6K-INS    | LZ                          | DN-S6K        | Raptor/ $\Delta$ CT | LZ                     | CA-S6K        |
| Body Weight (first surgery)  | 299 $\pm$ 4   | 300 $\pm$ 7   | 298 $\pm$ 4   | 298 $\pm$ 5   | 301 $\pm$ 8   | 301 $\pm$ 12  | 304 $\pm$ 12                | 301 $\pm$ 7   | 302 $\pm$ 9         | 309 $\pm$ 10           | 304 $\pm$ 14  |
| Body Weight (second surgery) | 310 $\pm$ 8   | 312 $\pm$ 9   | 310 $\pm$ 5   | 309 $\pm$ 7   | 306 $\pm$ 6   | 305 $\pm$ 10  | 303 $\pm$ 11                | 303 $\pm$ 8   | 300 $\pm$ 9         | 316 $\pm$ 13           | 305 $\pm$ 12  |
| Body Weight (clamp)          | 309 $\pm$ 7   | 312 $\pm$ 6   | 311 $\pm$ 7   | 303 $\pm$ 4   | 300 $\pm$ 5   | 301 $\pm$ 11  | 304 $\pm$ 11                | 301 $\pm$ 7   | 302 $\pm$ 10        | 313 $\pm$ 10           | 307 $\pm$ 11  |
| Insulin (pre-MBH insulin)    | 1.1 $\pm$ 0.4 | 1.1 $\pm$ 0.3 | 1.5 $\pm$ 0.4 | 1.0 $\pm$ 0.3 | 1.0 $\pm$ 0.4 | 1.2 $\pm$ 0.3 | 1.4 $\pm$ 0.5               | 1.1 $\pm$ 0.4 | 1.3 $\pm$ 0.4       | NA                     | NA            |
| Insulin (basal period)       | 1.0 $\pm$ 0.1 | 1.0 $\pm$ 0.2 | 1.1 $\pm$ 0.2 | 1.1 $\pm$ 0.1 | 1.0 $\pm$ 0.1 | 1.3 $\pm$ 0.2 | 1.2 $\pm$ 0.3               | 1.0 $\pm$ 0.3 | 1.1 $\pm$ 0.2       | 1.5 $\pm$ 0.4          | 1.6 $\pm$ 0.3 |
| Insulin (clamp period)       | 1.1 $\pm$ 0.2 | 1.2 $\pm$ 0.1 | 1.3 $\pm$ 0.2 | 1.3 $\pm$ 0.2 | 1.4 $\pm$ 0.2 | 1.3 $\pm$ 0.1 | 1.6 $\pm$ 0.3               | 1.6 $\pm$ 0.3 | 1.5 $\pm$ 0.2       | 4.2 $\pm$ 0.3          | 5.3 $\pm$ 0.7 |
| Glucose (pre-MBH insulin)    | 160 $\pm$ 4   | 158 $\pm$ 7   | 167 $\pm$ 10  | 155 $\pm$ 7   | 152 $\pm$ 7   | 166 $\pm$ 8   | 176 $\pm$ 8                 | 162 $\pm$ 4   | 174 $\pm$ 4         | NA                     | NA            |
| Glucose (basal period)       | 152 $\pm$ 6   | 153 $\pm$ 9   | 147 $\pm$ 4   | 150 $\pm$ 10  | 145 $\pm$ 11  | 160 $\pm$ 7   | 151 $\pm$ 6                 | 145 $\pm$ 9   | 146 $\pm$ 6         | 148 $\pm$ 5            | 154 $\pm$ 4   |
| Glucose (clamp period)       | 145 $\pm$ 4   | 140 $\pm$ 6   | 153 $\pm$ 5   | 142 $\pm$ 8   | 134 $\pm$ 9   | 156 $\pm$ 7   | 151 $\pm$ 9                 | 140 $\pm$ 11  | 139 $\pm$ 5         | 147 $\pm$ 5            | 150 $\pm$ 5   |
